# Supplementary material for: Trans-toxin ion-sensitivity of charybdotoxin-blocked potassium-channels reveals unbinding transitional states
Source: eLife journal article supplement (doi:10.7554/elife.46170), 2019-07-04
Supplement: supp [file elife-46170-supp-v1.zip]

Archive with 3 entries (3 files):
- elife_poa_e46170_Transparent_Reporting_File.pdf
- elife_poa_e46170_Figure_7_figure_supplement_2.pdf
- elife_poa_e46170_Figure_7_figure_supplement_1.pdf
