# Supplementary figures and images for: Trans-toxin ion-sensitivity of charybdotoxin-blocked potassium-channels reveals unbinding transitional states
Source: eLife journal article supplement (doi:10.7554/elife.46170), 2019-07-04

### Toxin bound channel

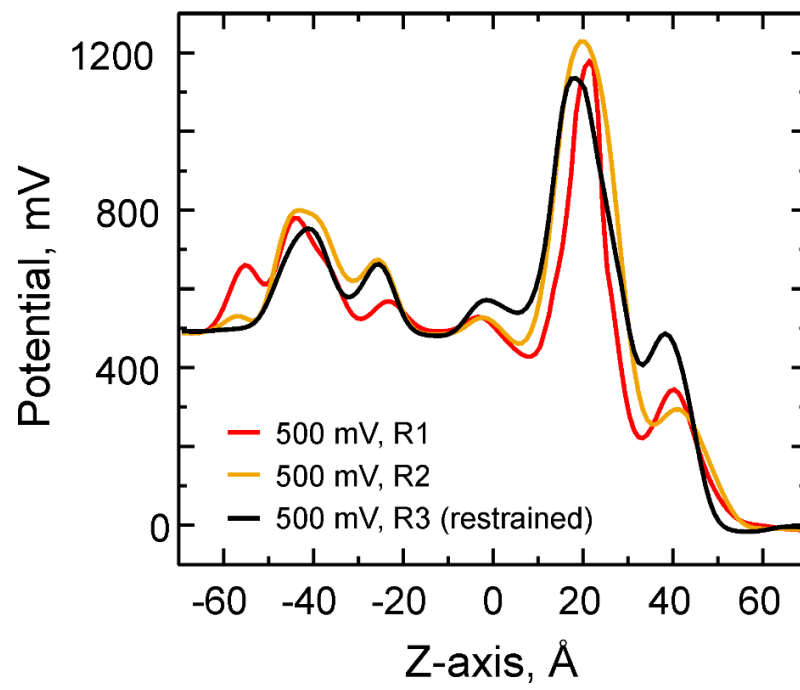

Supplement: supp [file elife-46170-supp-v1.zip]

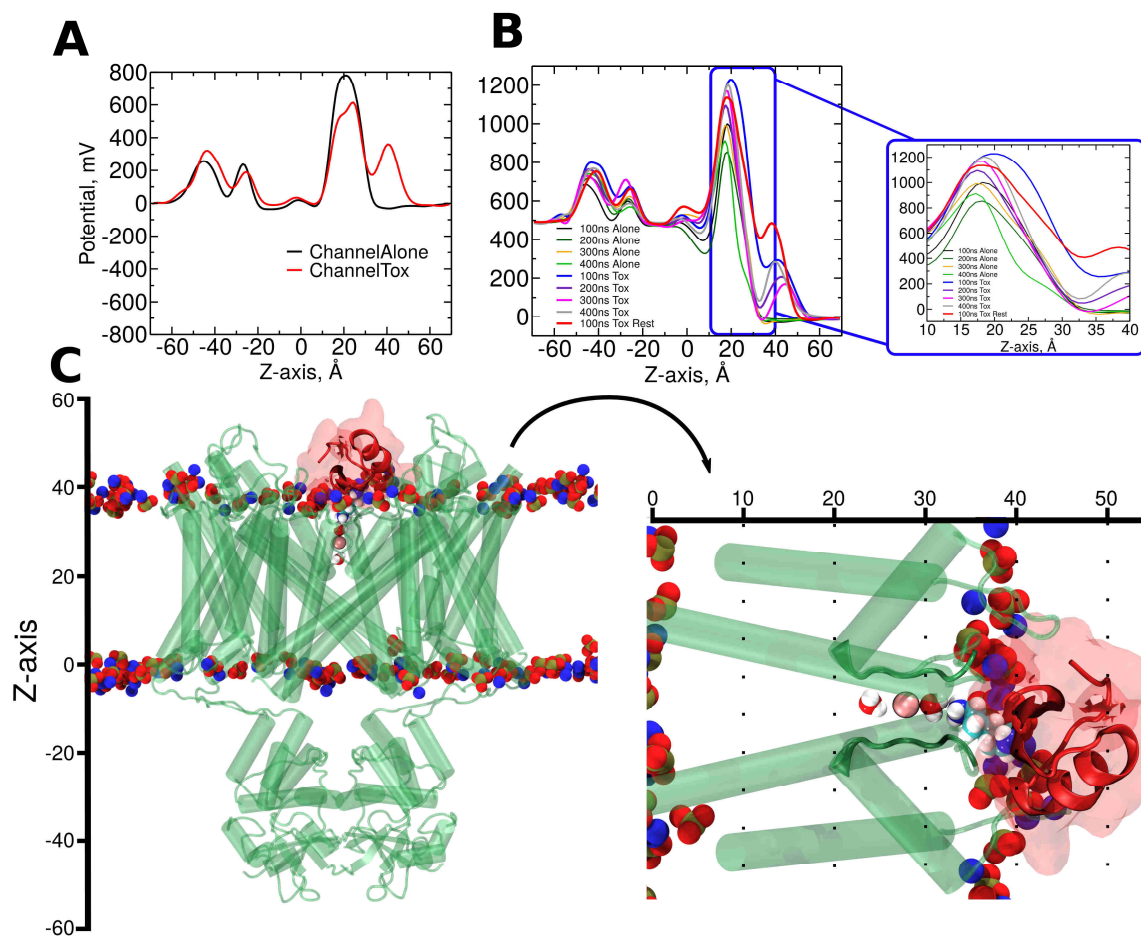

Supplement: supp [file elife-46170-supp-v1.zip]
